# Supplementary material
Source: PubMed Central journal article supplement (PMC5293539)
Supplement: NIHMS5500-supplement-Supplementary_Table_2.pdf [file NIHMS5500-supplement-Supplementary_Table_2.pdf]

**Supplementary Table 2| Association between methylation of the GR-encoding gene, early-life adversity and suicidal behaviour**

| <b>Study</b>                           | <b>Phenotype</b>                           | <b>Subjects</b>                                                                                                                                                                                                                                                                                                                                                                                   | <b>Tissue</b>                                               | <b>Major findings</b>                                                                                                                                                                                                                                                          |
|----------------------------------------|--------------------------------------------|---------------------------------------------------------------------------------------------------------------------------------------------------------------------------------------------------------------------------------------------------------------------------------------------------------------------------------------------------------------------------------------------------|-------------------------------------------------------------|--------------------------------------------------------------------------------------------------------------------------------------------------------------------------------------------------------------------------------------------------------------------------------|
| <b>Direct Early-Life Adversity</b>     |                                            |                                                                                                                                                                                                                                                                                                                                                                                                   |                                                             |                                                                                                                                                                                                                                                                                |
| <b>McGowan et al. 2009<sup>1</sup></b> | Abused suicides                            | 12 abused suicides<br>12 non-abused suicides<br>12 controls                                                                                                                                                                                                                                                                                                                                       | Hippocampus                                                 | Increased GR gene exon 1 <sub>F</sub> methylation in abused suicides                                                                                                                                                                                                           |
| <b>Perroud et al. 2011<sup>2</sup></b> | Sexually abused + BPD, MDD or MDD and PTSD | 101 subjects with BPD<br>52 sexual abuse<br>54 physical abuse<br>48 physical neglect<br>86 emotional abuse<br>83 emotional neglect<br>5 no adversity<br>99 MDD subjects with low rates of abuse<br>50 emotional neglect<br>49 no adversity<br>15 MDD subjects with PTSD<br>4 sexual abuse<br>6 physical abuse<br>5 physical neglect<br>9 emotional abuse<br>8 emotional neglect<br>0 no adversity | Peripheral blood leukocytes                                 | Increased GR gene exon 1 <sub>F</sub> methylation with sexual abuse, physical abuse and neglect, and emotional abuse and neglect<br>Increased methylation level with increased severity of abuse, with increased frequency of abuse, and with increasing number of abuse types |
| <b>Tyrka et al. 2012<sup>3</sup></b>   | Childhood maltreatment                     | 99 subjects<br>16 with childhood adversity                                                                                                                                                                                                                                                                                                                                                        | Whole blood                                                 | Increased GR gene exon 1 <sub>F</sub> methylation, near NGFI-A binding site, associated with parental loss, decreased parental care and maltreatment                                                                                                                           |
| <b>Labonte et al. 2012<sup>4</sup></b> | Suicide + childhood abuse                  | 56 subjects<br>21 suicide with abuse<br>21 suicide; no abuse<br>14 controls<br>50 Brodmann areas<br>22 suicide with abuse<br>14 suicide no abuse<br>14 controls                                                                                                                                                                                                                                   | Hippocampus<br><br><br><br>Anterior cingulate gyrus (BA 24) | Increased GR gene exon 1 <sub>B</sub> , 1 <sub>C</sub> methylation, and decreased GR gene exon 1 <sub>H</sub> methylation in the hippocampus, but not in BA24                                                                                                                  |

|                                              |                                                             |                                                                                                                                                                                                                                                                       |                             |                                                                                                                                                                                                                                                                                                                                                   |
|----------------------------------------------|-------------------------------------------------------------|-----------------------------------------------------------------------------------------------------------------------------------------------------------------------------------------------------------------------------------------------------------------------|-----------------------------|---------------------------------------------------------------------------------------------------------------------------------------------------------------------------------------------------------------------------------------------------------------------------------------------------------------------------------------------------|
| <b>Steiger et al. 2013<sup>5</sup></b>       | Bulimia nervosa (BN) + childhood abuse                      | 32 women with weekly bingeing episodes and childhood abuse<br>32 women weekly bingeing episodes but no childhood abuse<br>32 women without eating disorders, BPD or childhood abuse                                                                                   | Whole blood                 | Increased GR gene exon 1 <sub>C</sub> methylation in BN + BPD subjects but not in non-eating disorder subjects or BN without BPD<br>Decreased exon 1 <sub>H</sub> methylation in BN+BPD subjects but not in non-eating disorder subjects or BN without BPD                                                                                        |
| <b>Melas et al. 2013<sup>6</sup></b>         | Depressed + childhood adversity/ early parental death (EPD) | 93 depressed<br>28 no childhood adversities<br>65 with childhood adversities<br>83 control<br>31 no childhood adversities<br>52 with childhood adversities                                                                                                            | Saliva                      | Increased GR gene exon 1 <sub>F</sub> methylation near NGFI-A binding site in subjects with EPD (n=12) vs. no EPD (n=164)                                                                                                                                                                                                                         |
| <b>Perroud et al. 2014<sup>7</sup></b>       | Bipolar disorder + childhood trauma                         | 99 subjects with bipolar disorder<br>Emotional abuse 48%<br>Emotional neglect 56%<br>Physical abuse 33%<br>Physical neglect 29%<br>Sexual abuse 30%                                                                                                                   | Peripheral blood leukocytes | Increased GR gene exon 1 <sub>F</sub> methylation; correlated with increased alcohol abuse                                                                                                                                                                                                                                                        |
| <b>Van der Knaap et al. 2014<sup>8</sup></b> | Adolescents with childhood abuse/trauma                     | 468 subjects<br>437 subjects characterized:<br>84.8% with no, 4.6% with single, and 2.5% with repeated sexual abuse;<br>53.2% with no, 35.8% with single, and 2.9% with repeated physical abuse;<br>67.2% with no, 18.9% with single, 5.9% with repeated other trauma | Whole blood                 | Increased GR gene exon 1 <sub>F</sub> methylation in subjects with a history of repeated childhood abuse/trauma<br>Increased exon 1 <sub>H</sub> methylation in subjects with a history of single childhood sexual abuse<br>Decreased exon 1 <sub>D</sub> methylation in subjects with repeated other (non-physical, non-sexual) childhood trauma |

| <b>Indirect Adversity – Maternal Stress</b> |                                                                 |                                                                                                                                                   |                                |                                                                                                                                                                               |
|---------------------------------------------|-----------------------------------------------------------------|---------------------------------------------------------------------------------------------------------------------------------------------------|--------------------------------|-------------------------------------------------------------------------------------------------------------------------------------------------------------------------------|
| <b>Oberlander et al. 2008<sup>9</sup></b>   | Maternal gestational stress                                     | 82 pregnant women<br>33 depressed and SRI-treated<br>13 depressed not medicated<br>36 not depressed                                               | Cord blood                     | Increased GR gene methylation at NGFI-A binding site in offspring of women with depression/anxiety; correlated to salivary cortisol levels                                    |
| <b>Radtke et al. 2011<sup>10</sup></b>      | Intimate partner violence during gestation                      | 29 mother-infant pairs                                                                                                                            | Whole blood                    | Increased GR gene exon 1 <sub>F</sub> methylation in offspring of women with intimate partner violence during pregnancy                                                       |
| <b>Mulligan et al. 2012<sup>11</sup></b>    | Maternal gestational stress                                     | 25 women from a war zone (Democratic Republic of Congo; 2010)                                                                                     | Cord blood                     | Increased GR gene methylation with three different types of maternal stress (material deprivation, mundane stress, war stress)                                                |
| <b>El Hajj et al. 2013<sup>12</sup></b>     | Maternal gestational diabetes (GDM)                             | 88 dietetically-treated GDM<br>98 insulin-dependent GDM<br>65 control (no GDM)                                                                    | Cord blood and chorionic villi | Decreased GR gene exon 1 <sub>F</sub> methylation with GDM                                                                                                                    |
| <b>Hompes et al. 2013<sup>13</sup></b>      | Maternal gestational stress                                     | 83 pregnant women                                                                                                                                 | Cord blood                     | Increased GR gene exon 1 <sub>F</sub> methylation in certain loci                                                                                                             |
| <b>Conradt et al. 2013<sup>14</sup></b>     | Maternal depression during pregnancy                            | 482 women included<br>398 without depression or anxiety<br>39 with both depression and anxiety<br>27 with depression only<br>18 with anxiety only | Placenta                       | Increased GR gene methylation in infants whose mothers reported depression during pregnancy                                                                                   |
| <b>Perroud et al. 2014<sup>15</sup></b>     | Tutsi Rwanda genocide survivors <i>in utero</i> during conflict | 25 offspring of pregnant Tutsi war widows (aged 17-18)<br>25 controls                                                                             | Peripheral blood leukocytes    | Increased GR gene exon 1 <sub>F</sub> methylation in conflict survivors and their offspring; increased PTSD and depression severity in conflict survivors and their offspring |

**BA:** Brodmann area; **BN:** Bulimia nervosa; **BPD:** Borderline personality disorder; **EPD:** Early parental death; **GDM:** Gestational diabetes mellitus; **GR:** Glucocorticoid receptor; **MDD:** Major depressive disorder; **NGFI-A:** Nerve growth factor inducible protein A; **PTSD:** Post-traumatic stress disorder

## References for supplementary table 2

1. McGowan, P.O. et al. Epigenetic regulation of the glucocorticoid receptor in human brain associates with childhood abuse. *Nat Neurosci* **12**, 342-8 (2009).
2. Perroud, N. et al. Increased methylation of glucocorticoid receptor gene (NR3C1) in adults with a history of childhood maltreatment: a link with the severity and type of trauma. *Transl Psychiatry* **1**, e59 (2011).
3. Tyrka, A.R., Price, L.H., Marsit, C., Walters, O.C. & Carpenter, L.L. Childhood adversity and epigenetic modulation of the leukocyte glucocorticoid receptor: preliminary findings in healthy adults. *PLoS One* **7**, e30148 (2012).
4. Labonte, B. et al. Genome-wide epigenetic regulation by early-life trauma. *Arch Gen Psychiatry* **69**, 722-31 (2012).
5. Steiger, H., Labonte, B., Groleau, P., Turecki, G. & Israel, M. Methylation of the glucocorticoid receptor gene promoter in bulimic women: associations with borderline personality disorder, suicidality, and exposure to childhood abuse. *Int J Eat Disord* **46**, 246-55 (2013).
6. Melas, P.A. et al. Genetic and epigenetic associations of MAOA and NR3C1 with depression and childhood adversities. *Int J Neuropsychopharmacol* **16**, 1513-28 (2013).
7. Perroud, N. et al. Childhood maltreatment and methylation of the glucocorticoid receptor gene NR3C1 in bipolar disorder. *Br J Psychiatry* **204**, 30-5 (2014).
8. van der Knaap, L.J. et al. Glucocorticoid receptor gene (NR3C1) methylation following stressful events between birth and adolescence. The TRAILS study. *Transl Psychiatry* **4**, e381 (2014).
9. Oberlander, T.F. et al. Prenatal exposure to maternal depression, neonatal methylation of human glucocorticoid receptor gene (NR3C1) and infant cortisol stress responses. *Epigenetics* **3**, 97-106 (2008).
10. Radtke, K.M. et al. Transgenerational impact of intimate partner violence on methylation in the promoter of the glucocorticoid receptor. *Transl Psychiatry* **1**, e21 (2011).
11. Mulligan, C.J., D'Errico, N.C., Stees, J. & Hughes, D.A. Methylation changes at NR3C1 in newborns associate with maternal prenatal stress exposure and newborn birth weight. *Epigenetics* **7**, 853-7 (2012).
12. El Hajj, N. et al. Metabolic programming of MEST DNA methylation by intrauterine exposure to gestational diabetes mellitus. *Diabetes* **62**, 1320-8 (2013).
13. Hompes, T. et al. Investigating the influence of maternal cortisol and emotional state during pregnancy on the DNA methylation status of the glucocorticoid receptor gene (NR3C1) promoter region in cord blood. *J Psychiatr Res* **47**, 880-91 (2013).
14. Conradt, E., Lester, B.M., Appleton, A.A., Armstrong, D.A. & Marsit, C.J. The roles of DNA methylation of NR3C1 and 11beta-HSD2 and exposure to maternal mood disorder in utero on newborn neurobehavior. *Epigenetics* **8**, 1321-9 (2013).
15. Perroud, N. et al. The Tutsi genocide and transgenerational transmission of maternal stress: epigenetics and biology of the HPA axis. *World J Biol Psychiatry* **15**, 334-45 (2014).
